# Supplementary material for: Vertical leaping mechanics of the Lesser Egyptian Jerboa reveal specialization for maneuverability rather than elastic energy storage
Source: PubMed Central journal article supplement (PMC5496339; doi:10.1186/s12983-017-0215-z), 2017-07-03

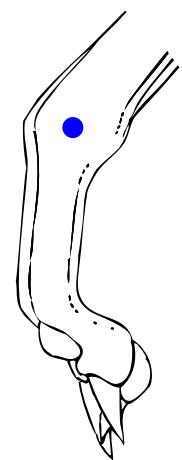

X-distance from Toe (mm)

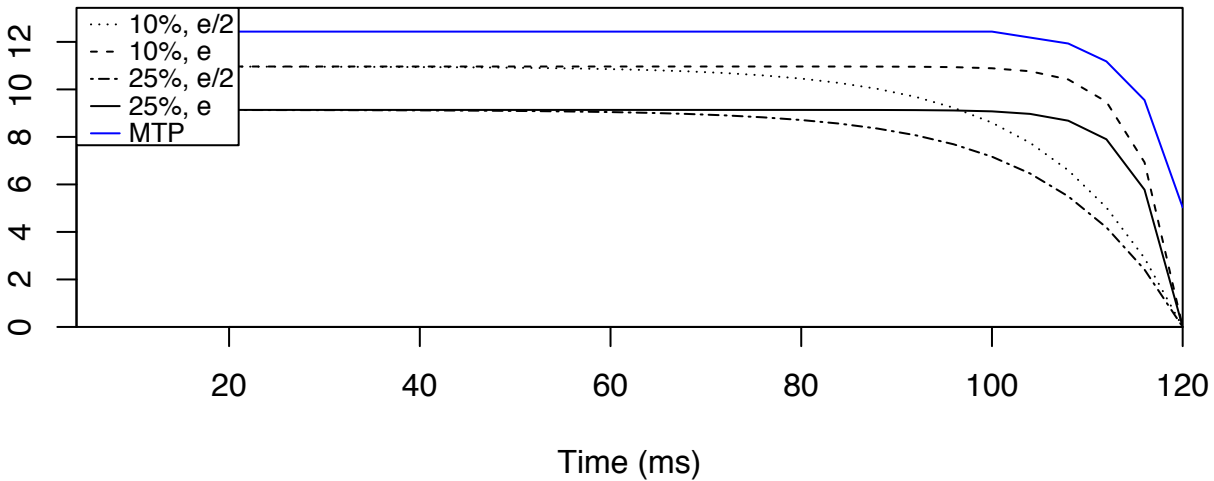

Supplement: 12983_2017_215_MOESM2_ESM.pdf [file 12983_2017_215_MOESM2_ESM.pdf]
