# Supplementary material for: Vertical leaping mechanics of the Lesser Egyptian Jerboa reveal specialization for maneuverability rather than elastic energy storage
Source: PubMed Central journal article supplement (PMC5496339; doi:10.1186/s12983-017-0215-z), 2017-07-03
Supplement: 12983_2017_215_MOESM3_ESM.pdf [file 12983_2017_215_MOESM3_ESM.pdf]

**Table S1** Effect of CoP model on muscle stress by joint. Stresses for each model are shown as a proportion of the model used (25% initial location, exponential movement).

| Joint | 10%, $e/2$ | 10%, $e$ | 25%, $e/2$ |
|-------|------------|----------|------------|
| MTP   | 2.01       | 1.31     | 2.35       |
| Ankle | 0.98       | 1.00     | 0.96       |
| Knee  | 0.96       | 0.98     | 0.94       |
| Hip   | 1.10       | 1.01     | 1.18       |
