# Supplementary material for: Vertical leaping mechanics of the Lesser Egyptian Jerboa reveal specialization for maneuverability rather than elastic energy storage
Source: PubMed Central journal article supplement (PMC5496339; doi:10.1186/s12983-017-0215-z), 2017-07-03

**MTP**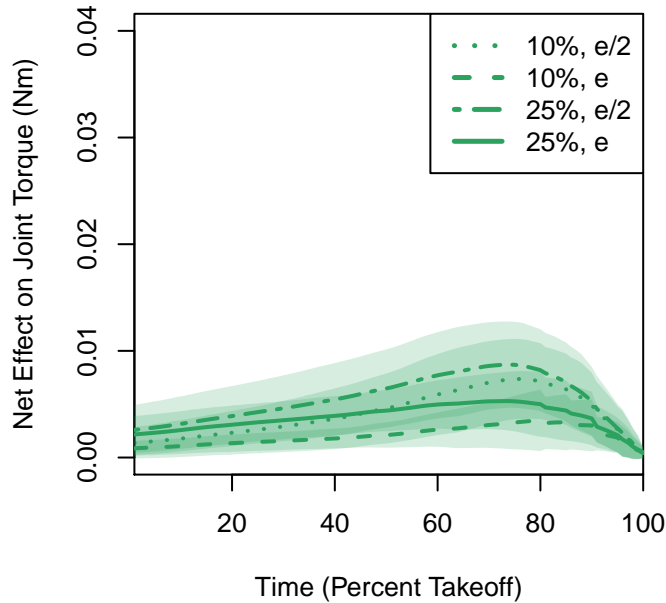**Ankle**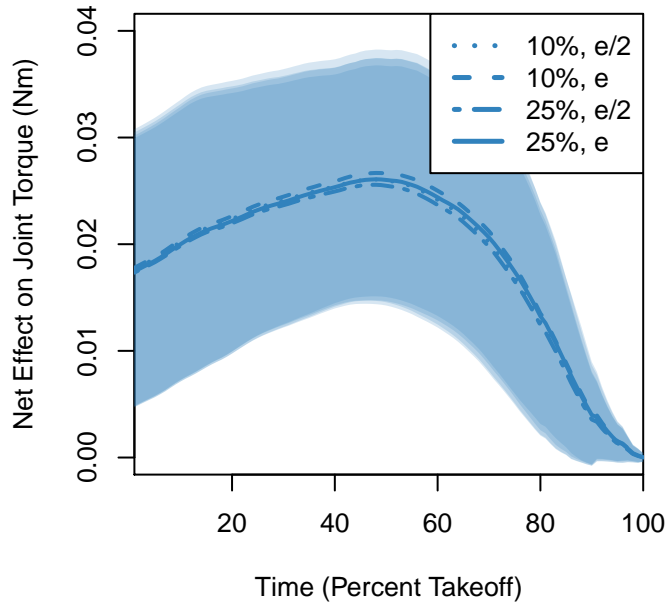**Knee**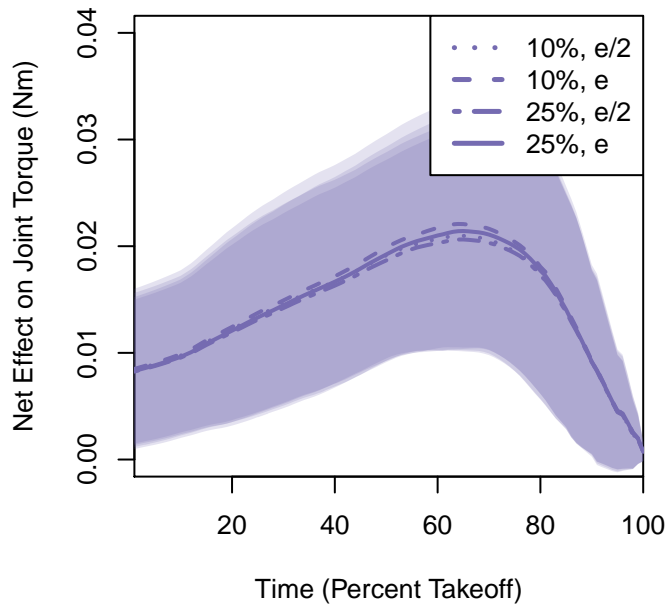**Hip**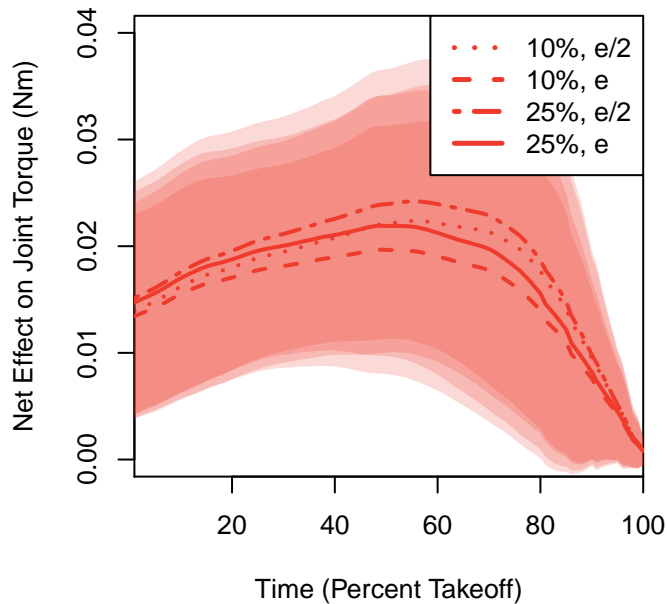

Supplement: 12983_2017_215_MOESM4_ESM.pdf [file 12983_2017_215_MOESM4_ESM.pdf]
